# Supplementary material
Source: publisher site journal article supplement (https://www.dovepress.com/article/417719)
Supplement: Supplementary file 1 [file get_supplementary_file.php]

**Additional file 1**

**Title: Prevalence and factors associated with depression among older adults during the COVID-19 pandemic: A cross-sectional study in urban areas in Thailand**

The full English language version of the questionnaire. The full English language version of the questionnaire contained all the details of the original Thai version of the questionnaire

**Questionnaire (English version)**

Consent from

( ) Allow ( ) Not allow

ID ………………

The questionnaire is divided into two sections.

**Sections I: Participants’ demographic**

| Age ………………. (years) |  |  |
| --- | --- | --- |
| Gender |  |  |
| □ Male |  |  |
| □ Female |  |  |
| Marital status |  |  |
| □ Single |  |  |
| □ Married |  |  |
| □Divorced/separated/widowed |  |  |
| Highest level of education |  |  |
| □ No education/Primary school |  |  |
| □ High school/Vocational certificate |  |  |
| Bachelor’s degree or higher |  |  |
| Current occupation |  |  |
| □ Retired |  |  |
| □ Worker |  |  |
| □ Non-worker |  |  |
| Monthly income in baht (USD) |  |  |
| □ ≤ 15,000 (420 USD) |  |  |
| □ > 15,001 (421 USD) |  |  |
| Sufficient income |  |  |
| □ Sufficient |  |  |
| □ Insufficient |  |  |
| Housing |  |  |
| □ Living with family |  |  |
| □ Living alone |  |  |
| Underlying disease |  |  |
| □ Hypertension |  |  |
| □ Dyslipidemia |  |  |
| □ Diabetes mellitus |  |  |
| □ Osteoarthritis |  |  |
| □ Heart disease |  |  |
| □ Kidney disease |  |  |
| □ Others |  |  |
| Alcohol and Smoking (over 10 years period) |  |  |
| □ Alcohol |  |  |
| □ Smoking |  |  |
| History of COVID-2019 infection |  |  |
| Participant |  |  |
| □ History of COVID-19 infection |  |  |
| □ History of being quarantined |  |  |
| □ Received compulsory COVID-19 vaccination |  |  |
| Community of participant |  |  |
| □ History of COVID-19 infection |  |  |
| □ History of being quarantined |  |  |

**Sections II: Thai Geriatric Depression Scale (TGDS-15)**

1. Are you basically satisfied with your life?

| □ Yes |
| --- |
| □ No |

1. Have you dropped many of your activities and interests?

| □ Yes |
| --- |
| □ No |

1. Do you feel that your life is empty?

| □ Yes |
| --- |
| □ No |

1. Do you often get bored?

| □ Yes |
| --- |
| □ No |

1. Are you in good spirits most of the time?

| □ Yes |
| --- |
| □ No |

1. Are you afraid that something bad is going to happen to you?

| □ Yes |
| --- |
| □ No |

1. Do you feel happy most of the time?

| □ Yes |
| --- |
| □ No |

1. Do you often feel helpless?

| □ Yes |
| --- |
| □ No |

1. Do you prefer to stay at home, rather than going out and doing things?

| □ Yes |
| --- |
| □ No |

1. Do you feel that you have more problems with memory than most?

| □ Yes |
| --- |
| □ No |

1. Do you think it is wonderful to be alive now?

| □ Yes |
| --- |
| □ No |

1. Do you feel worthless the way you are now?

| □ Yes |
| --- |
| □ No |

1. Do you feel full of energy?

| □ Yes |
| --- |
| □ No |

1. Do you feel that your situation is hopeless?

| □ Yes |
| --- |
| □ No |

1. Do you think that most people are better off than you are?

| □ Yes |
| --- |
| □ No |
